# Supplementary material
Source: PubMed Central journal article supplement (PMC9979685)
Supplement: boe-14-2-550-s001.pdf [file boe-14-2-550-s001.pdf]

## Evaluation of Slowfade Diamond as a buffer for STORM microscopy: supplement

**HADJER BOUKHATEM,<sup>1</sup> BEATRICE DUREL,<sup>2</sup> MANON RAIMBAULT,<sup>2</sup>  
AUDREY LAURENT,<sup>3,4</sup> AND NICOLAS OLIVIER<sup>1,\*</sup> **

<sup>1</sup>Laboratory for Optics and Biosciences (LOB), CNRS, INSERM, École polytechnique, Institut Polytechnique de Paris, 91120 Palaiseau, France

<sup>2</sup>Cell Imaging Platform, Structure Fédérative de Recherche Necker, INSERM US24, CNRS UMS3633, Paris, F-75015, France

<sup>3</sup>Université de Paris, Institut-Necker-Enfants-Malades, Inserm, CNRS, Paris, France

<sup>4</sup>École Doctorale BioSPC 562, Université de Paris, Paris, France

\*[nicolas.olivier@polytechnique.edu](mailto:nicolas.olivier@polytechnique.edu)

---

This supplement published with Optica Publishing Group on 4 January 2023 by The Authors under the terms of the [Creative Commons Attribution 4.0 License](https://creativecommons.org/licenses/by/4.0/) in the format provided by the authors and unedited. Further distribution of this work must maintain attribution to the author(s) and the published article's title, journal citation, and DOI.

Supplement DOI: <https://doi.org/10.6084/m9.figshare.21679493>

Parent Article DOI: <https://doi.org/10.1364/BOE.473463>

# Evaluation of Slowfade Diamond as a Buffer for STORM Microscopy: supplemental document

| Fluorophore     | Antibody type         | Reference             |
|-----------------|-----------------------|-----------------------|
| Dylight 488     | Horse anti-mouse      | Vectorlab DI-2488     |
| Alexa Fluor 488 | Goat anti-mouse       | Thermofisher A-11029  |
| CF 488          | Chicken anti-mouse    | Sigma SAB4600029      |
| Alexa Fluor 514 | Goat anti-mouse       | Thermofisher A31555   |
| Alexa Fluor 532 | Goat anti-mouse       | Thermofisher A-11002  |
| CF 532          | Goat anti-mouse       | Biotium 20365         |
| Alexa Fluor 546 | Goat anti-mouse       | Thermofisher A-11030  |
| Dylight 549     | Horse anti-mouse      | Vectorlab DI-2549     |
| Atto 550        | Goat anti-mouse       | Sigma 43394           |
| Alexa Fluor 555 | Donkey anti-mouse     | Thermofisher A-31570  |
| Alexa Fluor 555 | Goat anti-mouse Fab'2 | Thermofisher A-21425  |
| CF 555          | Rabbit anti-mouse     | Biotium 20235         |
| Cy3             | Goat anti-rat(*)      | Thermofisher A-10522  |
| CF 568          | Goat anti-mouse       | Biotium 20101         |
| Alexa Fluor 568 | Goat anti-mouse       | Thermofisher A-11031  |
| Dylight 594     | Horse anti-mouse      | Vectorlab DI-2594     |
| Alexa Fluor 594 | Goat anti-mouse       | Thermofisher A-21135  |
| CF 647          | Goat anti-mouse       | Sigma SAb4600182      |
| Alexa Fluor 647 | Goat anti-mouse       | Thermofisher A-21236  |
| Dylight 649     | Horse anti-mouse      | Vectorlab DI-2649     |
| CF 660C         | Goat anti-mouse       | Biotium 20050         |
| CF 680          | Goat anti-mouse       | Biotium 20065         |
| Alexa Fluor 700 | Goat anti-mouse       | Thermofisher A-21036  |
| CF 750          | Goat anti-mouse       | Biotium 20463         |
| Dylight 755     | Donkey anti-rat(*)    | Thermofisher SA510031 |

**Table S1. List of secondary antibodies used**

All antibodies were used at a concentration of 1:500

(\*):tested with rat anti  $\alpha$ -tubulin (abcam ab6160)

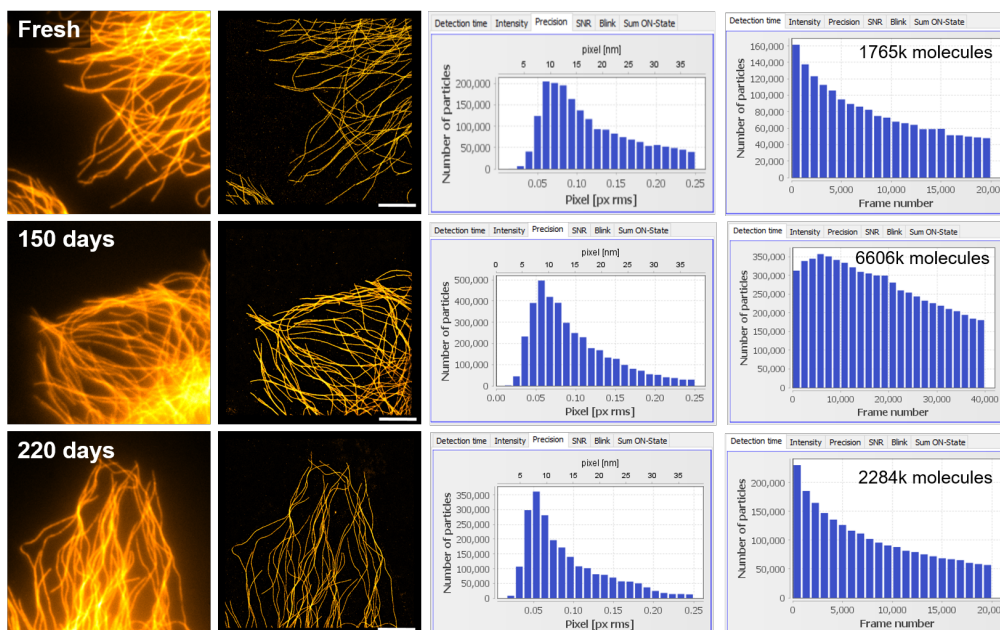

**Fig. S1.** Further quantification of Alexa Fluor 555 blinking in Slowfade Diamond. From top to bottom: sample freshly mounted, sample mounted  $\approx 150$  days before, and  $\approx 220$  days before. From left to right: widefield image, STORM image, Localization precision histograms, and number of detected particles per 1000 frames. Scalebars =  $5\mu m$

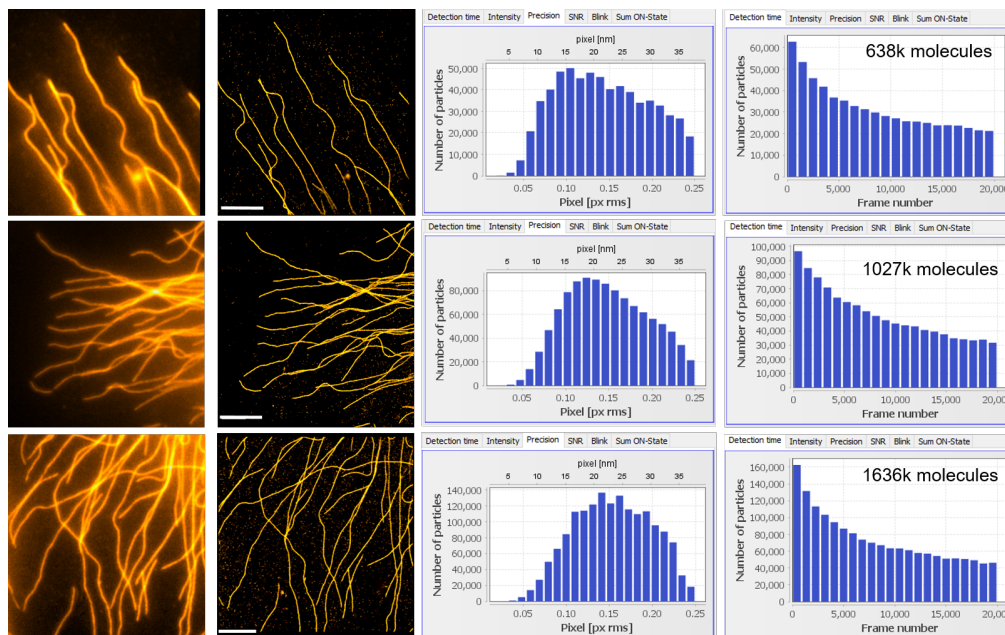

**Fig. S2.** Further quantification of Alexa Fluor 532 blinking in Slowfade Diamond. From left to right: widefield image, STORM image, Localization precision histograms, and number of detected particles per 1000 frames. Scalebars =  $5\mu m$

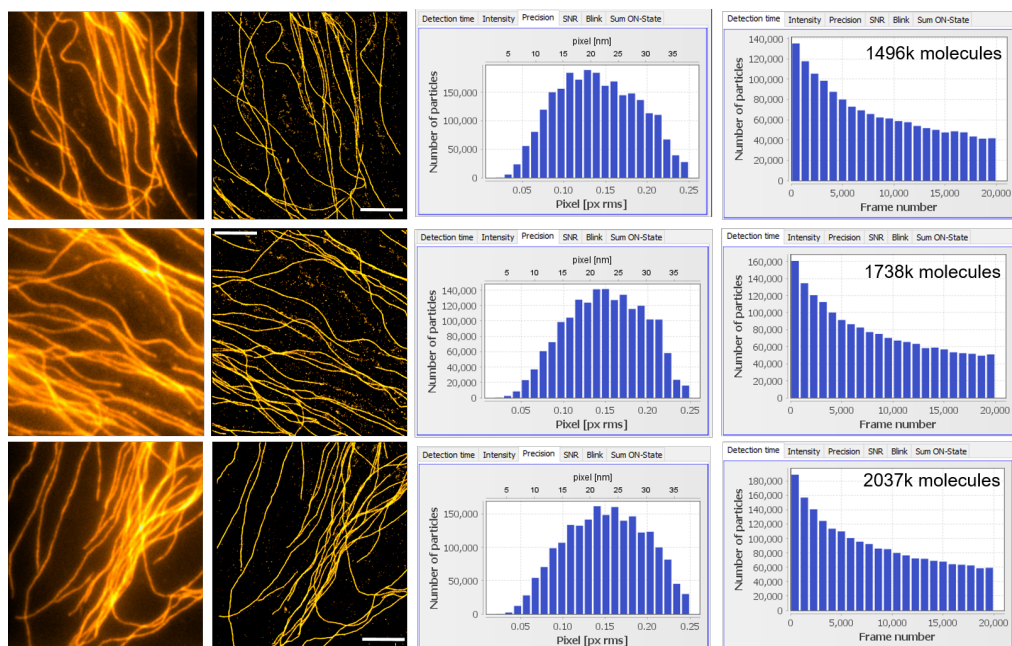

**Fig. S3.** Further quantification of CF 532 blinking in Slowfade Diamond. From left to right: widefield image, STORM image, Localization precision histograms, and number of detected particles per 1000 frames. Scalebars =  $5\mu m$

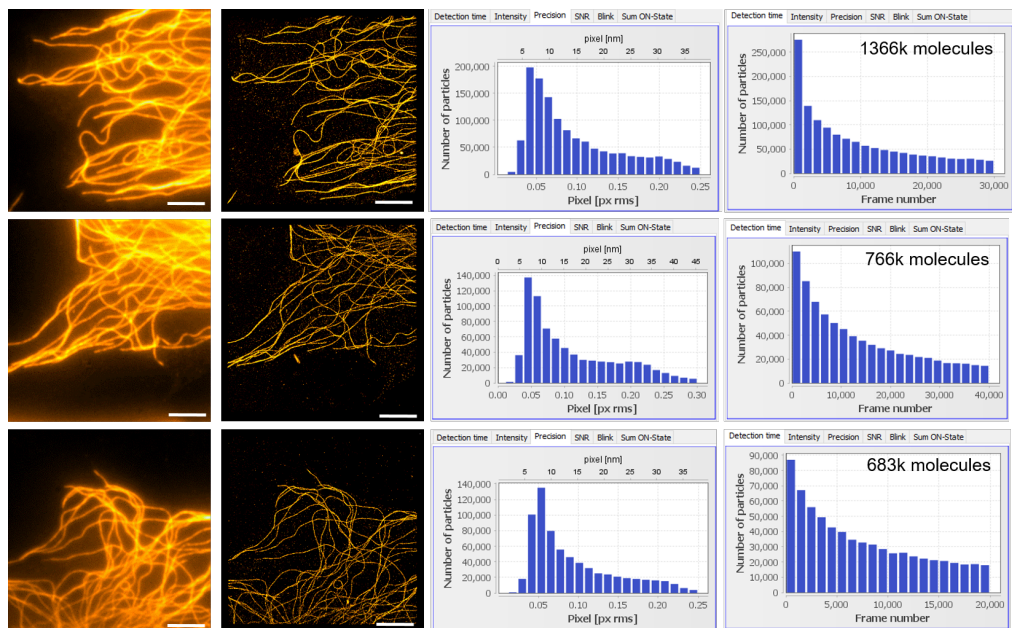

**Fig. S4.** Further quantification of Dylight 549 blinking in Slowfade Diamond. From left to right: widefield image, STORM image, Localization precision histograms, and number of detected particles per 1000 frames. Scalebars =  $5\mu m$

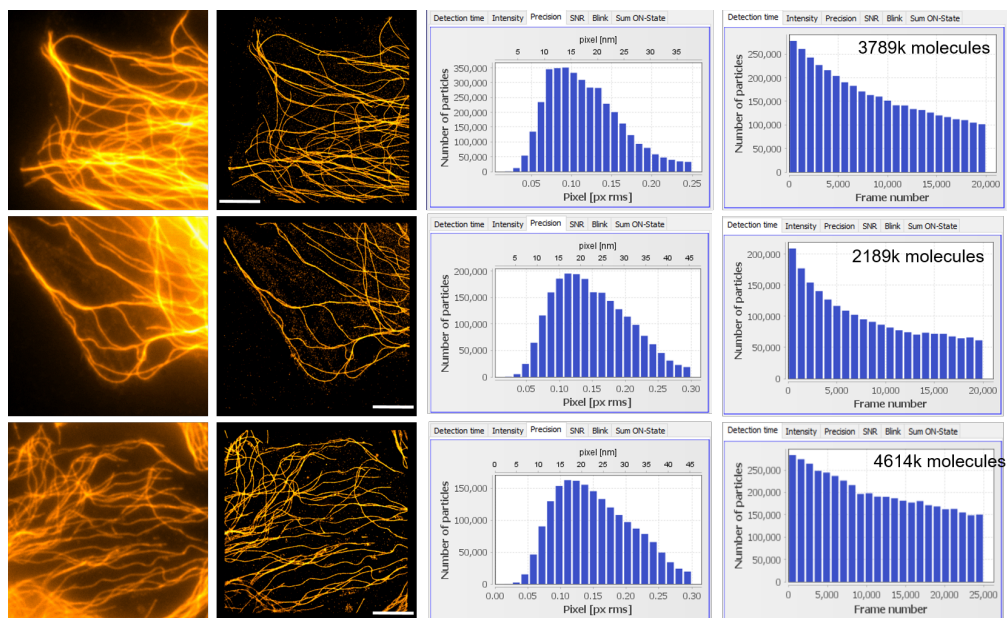

**Fig. S5.** Further quantification of Atto 550 blinking in Slowfade Diamond. From left to right: widefield image, STORM image, Localization precision histograms, and number of detected particles per 1000 frames. Scalebars =  $5\mu m$

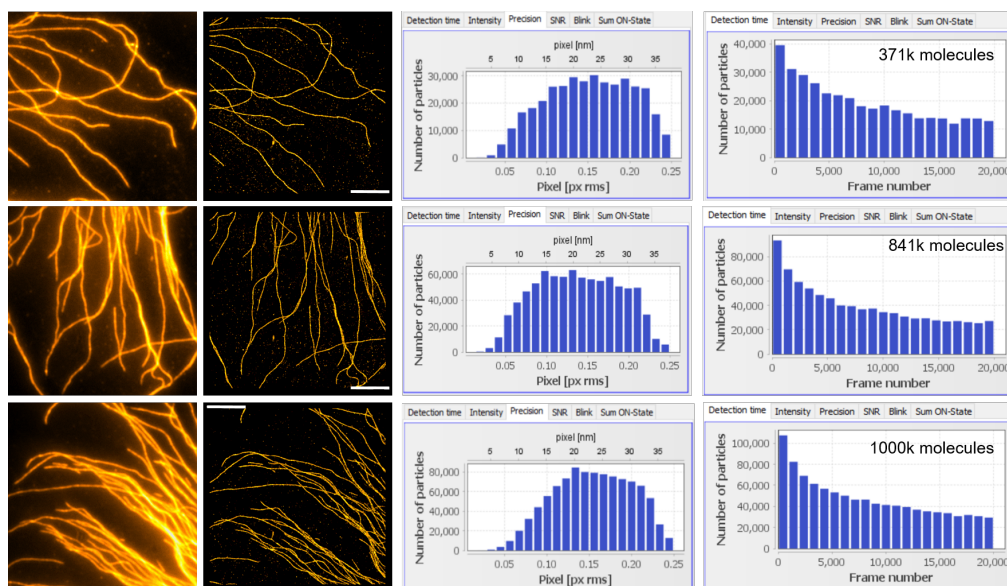

**Fig. S6.** Further quantification of CF 568 blinking in Slowfade Diamond. From left to right: widefield image, STORM image, Localization precision histograms, and number of detected particles per 1000 frames. Scalebars =  $5\mu m$

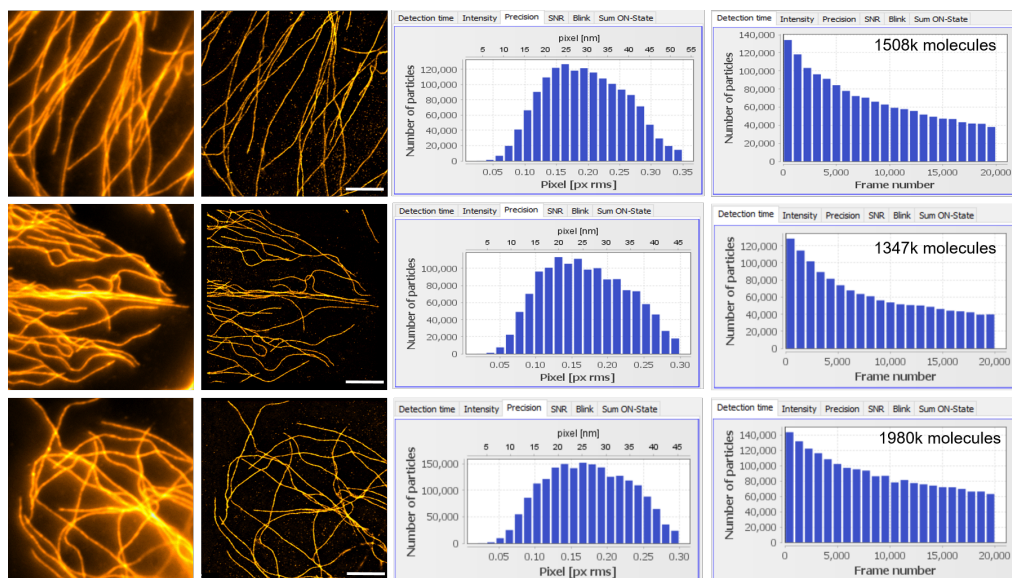

**Fig. S7.** Further quantification of Alexa Fluor 594 blinking in Slowfade Diamond. From left to right: widefield image, STORM image, Localization precision histograms, and number of detected particles per 1000 frames. Scalebars =  $5\mu m$

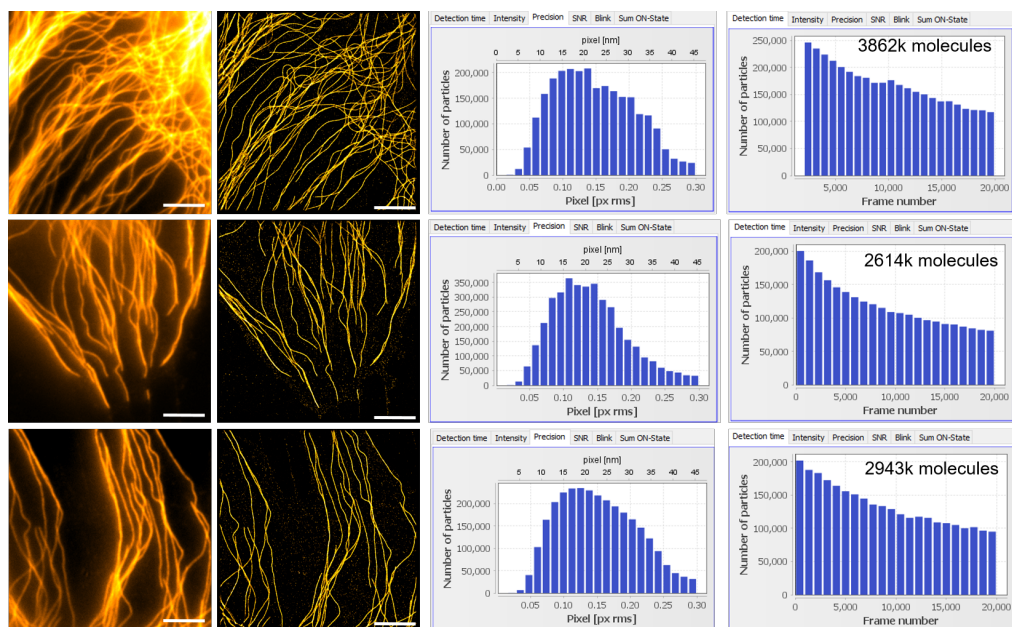

**Fig. S8.** Further quantification of Dylight 594 blinking in Slowfade Diamond. From left to right: widefield image, STORM image, Localization precision histograms, and number of detected particles per 1000 frames. Scalebars =  $5\mu m$

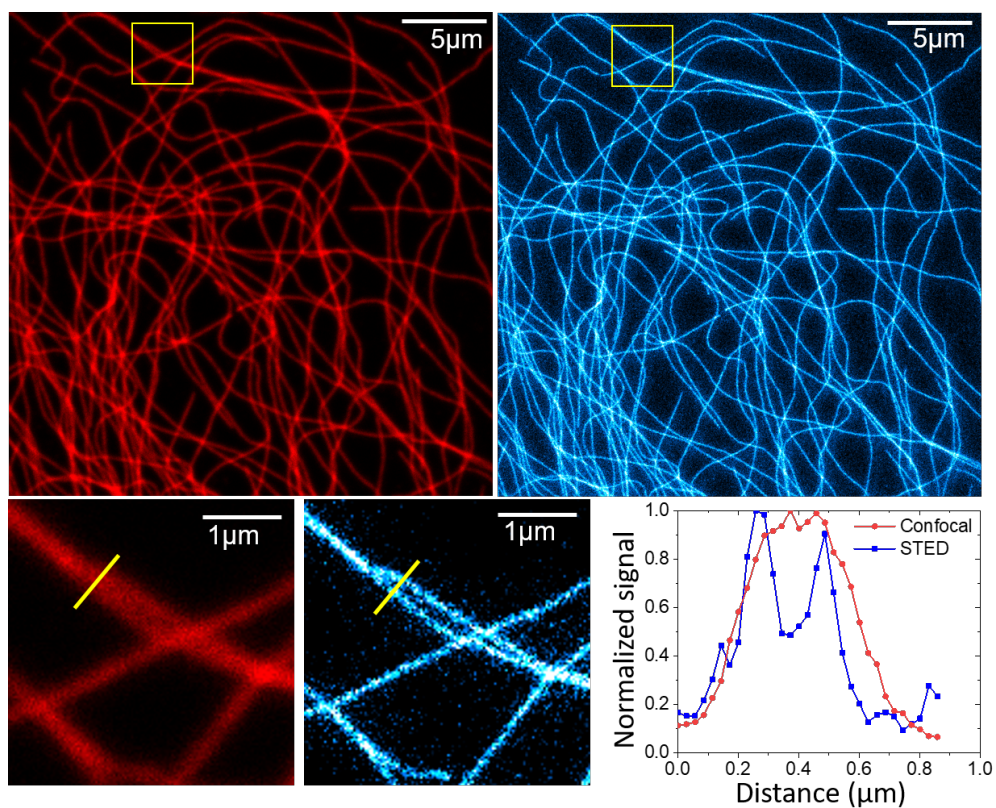

**Fig. S9.** Confocal and STED imaging of Alexa-555 in Slowfade Diamond. Top row: Confocal image (left) and STED image (right). Bottom row: Zoom to the region highlighted in the yellow boxes, and line profile taken through two neighboring microtubule. This imaging was taken on a sample previously used for STORM imaging. Method: STED imaging was performed on a Leica TCS SP8 STED using a 100X 1.4 NA objective. Excitation was provided by a white-light laser set to 530 nm, and depletion was done using 660 nm laser. Detection was done using HyD detectors, with a pinhole of 1AU (160  $\mu\text{m}$ ), and using time-gating of 6 ns. The pixel size was set to 27 nm, and the images displayed are the average of a z-stack of 10 images taken every 250 nm
